# Supplementary material
Source: publisher figshare collection journal article supplement (https://acs.figshare.com/ndownloader/files/12465665)
Supplement: Supplementary file 1 [file 12465665]

## The effect of charcoal in cigarette filters on free radicals in mainstream smoke

*Reema Goel<sup>†</sup>, Zachary T. Bitzer<sup>‡</sup>, Samantha M. Reilly<sup>†</sup>, Gurkirat Bhangu<sup>†</sup>, Neil Trushin<sup>†</sup>, Ryan J. Elias<sup>‡</sup>, Jonathan Foulds<sup>†</sup>, Joshua Muscat<sup>†</sup>, John P. Richie, Jr<sup>†,\*</sup>.*

<sup>†</sup>Department of Public Health Sciences, Pennsylvania State University Tobacco Center of Regulatory Science (TCORS), Pennsylvania State University College of Medicine, Hershey, PA 17033.

<sup>‡</sup>Department of Food Science, Pennsylvania State University, College of Agricultural Sciences, University Park, PA.

**\*Corresponding Author.** Department of Public Health Sciences, Pennsylvania State University Tobacco Center of Regulatory Science (TCORS), Pennsylvania State University College of Medicine, 500 University Dr. – Mail Code: CH69, Hershey, PA, USA 17033. Phone: 717-531-5381; E-mail: jrichie@psu.edu

Table of Contents:

Table S1.....Pg S2.

**Table S1:** Filtration properties of the three different types of activated charcoal selected in this study to examine effects on cigarette mainstream free radical and nicotine levels.

| Charcoal Type | Name               | Description                                         | Mesh Size | Sampling properties                                                                                                                                                                                                                                                                                     |
|---------------|--------------------|-----------------------------------------------------|-----------|---------------------------------------------------------------------------------------------------------------------------------------------------------------------------------------------------------------------------------------------------------------------------------------------------------|
| <b>A</b>      | <b>Anasorb 747</b> | Beaded active carbon                                | 20/40     | High surface area<br>Capacity for organic vapors similar to petroleum-based and coconut-shell charcoal Effective collector of non-polar and polar organic compounds<br>Normally used with solvent desorption.<br>Recommended Temperature Limit 350 C (Maximum temperature limit with a nitrogen purge.) |
| <b>B</b>      | <b>Anasorb CSC</b> | Coconut-shell Charcoal                              | 20/40     | High surface area for sampling a broad range of primarily nonpolar compounds<br>Recommended Temperature Limit 900 C. (Maximum temperature limit with a nitrogen purge.)                                                                                                                                 |
| <b>C</b>      | <b>Anasorb JXC</b> | Charcoal derived from residue of petroleum products | 20/40     | High surface area for sampling a wide range of both polar and non-polar products<br>Recommended Temperature Limit 750 C (Maximum temperature limit with a nitrogen purge.)                                                                                                                              |
